# Supplementary material for: Pharmacogenetics of Osteoporosis: A Pathway Analysis of the Genetic Influence on the Effects of Antiresorptive Drugs
Source: MDPI journal article supplement (doi:10.3390/pharmaceutics14040776), 2022-04-02
Supplement: s1 [file s1]

# Supplementary Materials: Pharmacogenetics of Osteoporosis: A Pathway Analysis of the Genetic Influence on the Effects of Antiresorptive Drugs

Álvaro del Real, Carmen Valero, Jose M. Olmos, José L. Hernández and José A. Riancho

**Table S1.** Genes and number of SNPs studied.

| Gene    | Pathway    | Number of SNPs |
|---------|------------|----------------|
| ARSD    | Oestrogen  | 20             |
| ARSL    | Estrogen   | 9              |
| CYP19A1 | Estrogen   | 42             |
| CYP1A1  | Estrogen   | 4              |
| CYP1A2  | Estrogen   | 16             |
| CYP1B1  | Estrogen   | 56             |
| CYP2D6  | Estrogen   | 14             |
| CYP3A4  | Estrogen   | 14             |
| EGF     | Estrogen   | 26             |
| ELK1    | Estrogen   | 1              |
| ERK1    | Estrogen   | 15             |
| ESR1    | Estrogen   | 91             |
| ESR2    | Estrogen   | 13             |
| FOS     | Estrogen   | 39             |
| GPB1    | Estrogen   | 9              |
| HSD17B1 | Estrogen   | 2              |
| IKBKB   | Estrogen   | 6              |
| IKBKG   | Estrogen   | 1              |
| JUN     | Estrogen   | 15             |
| MAP2K1  | Estrogen   | 10             |
| MAPK1   | Estrogen   | 15             |
| MAPK14  | Estrogen   | 9              |
| MAPK8   | Estrogen   | 20             |
| MAPK9   | Estrogen   | 22             |
| NFKB1   | Estrogen   | 35             |
| SP1     | Estrogen   | 9              |
| STS     | Estrogen   | 41             |
| SULT1A1 | Estrogen   | 4              |
| SULT1E1 | Estrogen   | 21             |
| SULT2A1 | Estrogen   | 19             |
| UGT1A1  | Estrogen   | 7              |
| UGT1A8  | Estrogen   | 22             |
| UGT1A9  | Estrogen   | 38             |
| UGT2B7  | Estrogen   | 29             |
| ACAT1   | Mevalonate | 3              |
| ACAT2   | Mevalonate | 7              |
| DHDDS   | Mevalonate | 3              |
| FDPS    | Mevalonate | 4              |

|          |            |    |
|----------|------------|----|
| FNTA     | Mevalonate | 4  |
| FNTB     | Mevalonate | 31 |
| HMGCR    | Mevalonate | 9  |
| HMGCS1   | Mevalonate | 4  |
| HMGCS2   | Mevalonate | 5  |
| ICMT     | Mevalonate | 2  |
| IDI1     | Mevalonate | 3  |
| IDI2     | Mevalonate | 5  |
| MVD      | Mevalonate | 8  |
| MVK      | Mevalonate | 6  |
| NUS1     | Mevalonate | 4  |
| PCYOX1   | Mevalonate | 1  |
| PDSS1    | Mevalonate | 21 |
| PDSS2    | Mevalonate | 27 |
| PMVK     | Mevalonate | 2  |
| RCE1     | Mevalonate | 1  |
| ZMPSTE24 | Mevalonate | 4  |
